# Supplementary material for: Porphyrin-based graphene oxide frameworks with ultra-large d-spacings for the electrocatalyzation of oxygen reduction reaction
Source: Royal Society of Chemistry journal article supplement (doi:10.1039/c5cp02853a), 2015-01-01
Supplement: c5cp02853a1.pdf [file c5cp02853a1.pdf]

## Supplementary Information for

### Porphyrin-based graphene oxide frameworks with ultra- large d-spacings for electrocatalyzation of oxygen reduction reaction

**Bowen Yao,<sup>a</sup> Chun Li,<sup>a</sup> Jun Ma,<sup>b</sup> and Gaoquan Shi<sup>a,\*</sup>**

<sup>a</sup>Department of Chemistry, Tsinghua University, Beijing 100084, People's Republic of China. Fax: 86 62771149; Tel: 86 6277 3743. E-mail: gshi@tsinghua.edu.cn

<sup>b</sup>School of Engineering, University of South Australia, SA 5095, Australia

**Table S1** Elemental atomic contents of GO, GO<sub>NH3</sub> and P-GOF calculated from their XPS spectra

| Sample            | C (%) | O (%) | N (%) | B (%) |
|-------------------|-------|-------|-------|-------|
| GO                | 65.2  | 33.5  | 0.92  | 0.35  |
| GO <sub>NH3</sub> | 67.9  | 27.9  | 3.86  | 0.31  |
| P-GOF             | 68.8  | 25.0  | 4.50  | 2.50  |

**Table S2** The fitting results of the modified electrodes from EIS spectra with Randles equivalent circuits

| Catalysts | R <sub>Ω</sub> | R <sub>ct</sub> | CPE <sub>1</sub> (μF) | p <sub>1</sub> | CPE <sub>2</sub> (mF) | p <sub>2</sub> |
|-----------|----------------|-----------------|-----------------------|----------------|-----------------------|----------------|
| P-GOF     | 15.90          | 305.1           | 9.4                   | 0.862          | 0.520                 | 0.387          |
| P-rGOF    | 14.08          | 2.5             | 2043.0                | 0.477          | 2.860                 | 0.190          |
| Mn-GOF    | 14.53          | 218.0           | 9.3                   | 0.858          | 0.459                 | 0.338          |
| Mn-rGOF   | 12.81          | 3.3             | 1960.0                | 0.439          | 2.570                 | 0.818          |
| Fe-GOF    | 14.26          | 229.2           | 7.1                   | 0.872          | 0.419                 | 0.366          |
| Fe-rGOF   | 14.03          | 2.6             | 2247.0                | 0.461          | 2.570                 | 0.827          |
| Co-GOF    | 14.03          | 336.3           | 6.4                   | 0.870          | 0.477                 | 0.385          |
| Co-rGOF   | 12.99          | 4.5             | 2582.0                | 0.741          | 1.450                 | 0.530          |

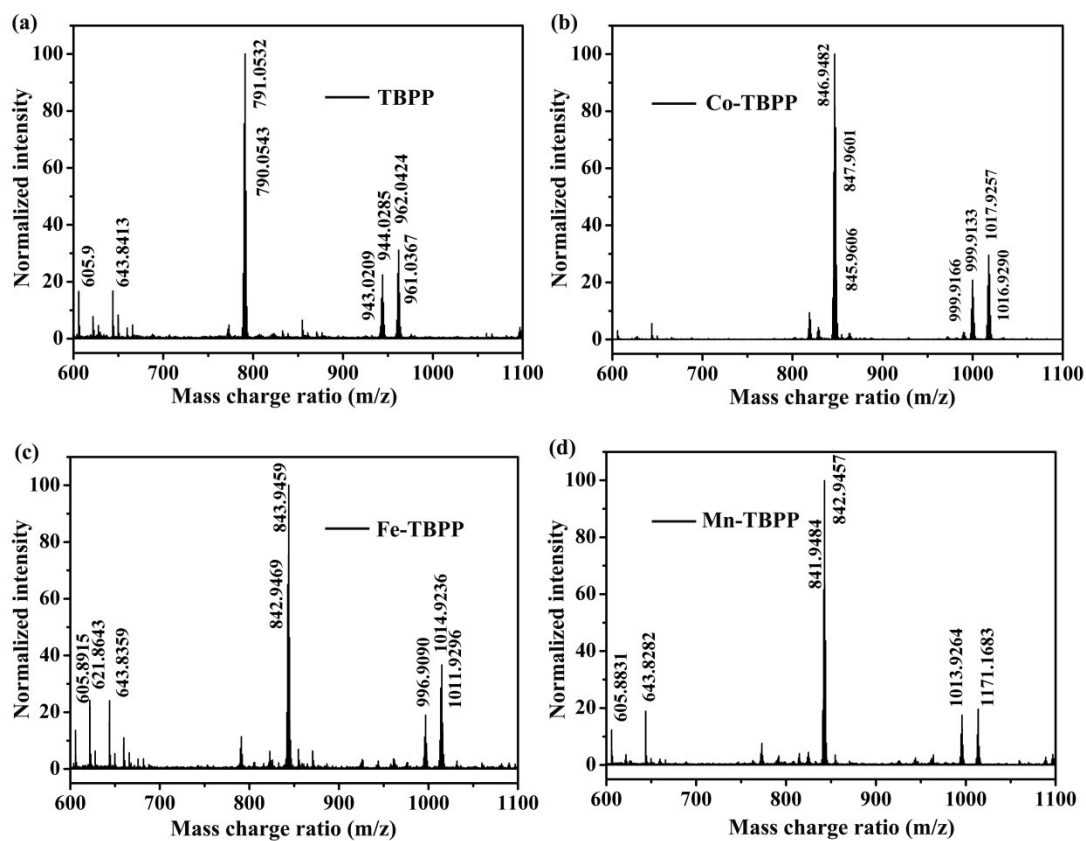

**Fig. S1** Mass spectra of (a) TBPP, (b) Co-TBPP, (c) Fe-TBPP and (d) Mn-TBPP.

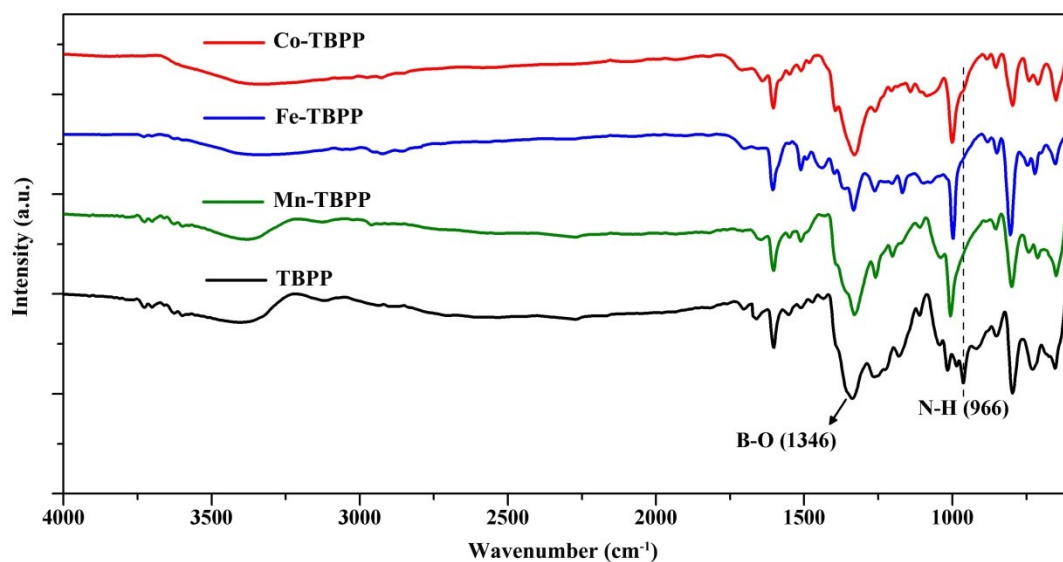

**Fig. S2** IR spectra of TBPP, Co-TBPP, Fe-TBPP and Mn-TBPP indicate that MnP, FeP and CoP were obtained as evidenced by the disappearance of N-H stretch vibration at around 966 cm<sup>-1</sup>.

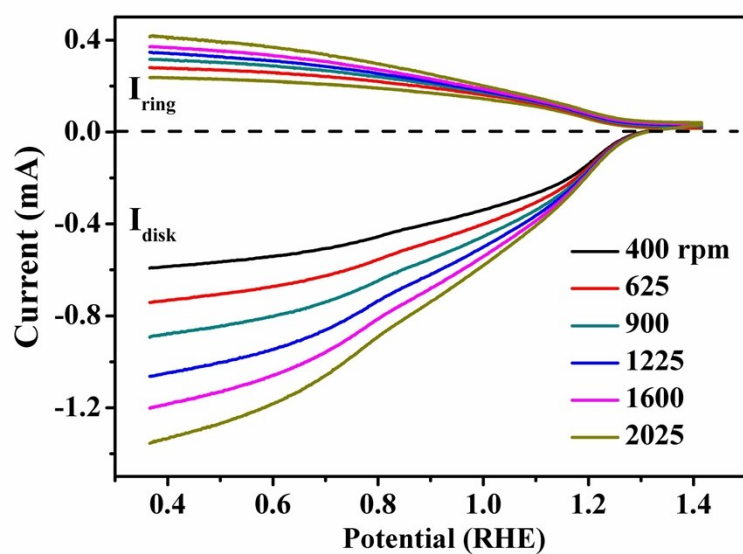

**Fig. S3** RRDE measurement of Co-rGOF electrode in 0.1 M NaOH solution containing 10 mM  $K_3Fe(CN)_6$  at scan rate of  $50 \text{ mV s}^{-1}$ . Collection efficiency was calculated from the equation:  $N=I_r/I_d$ .

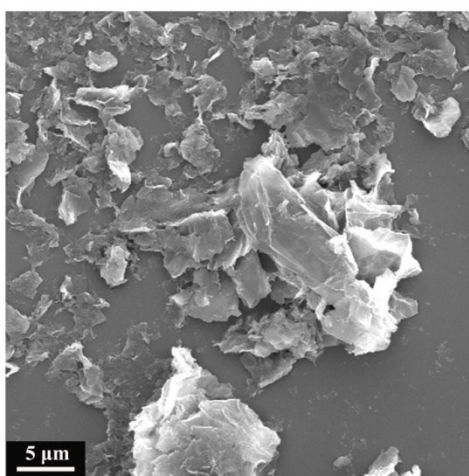

**Fig. S4** SEM images of GO.

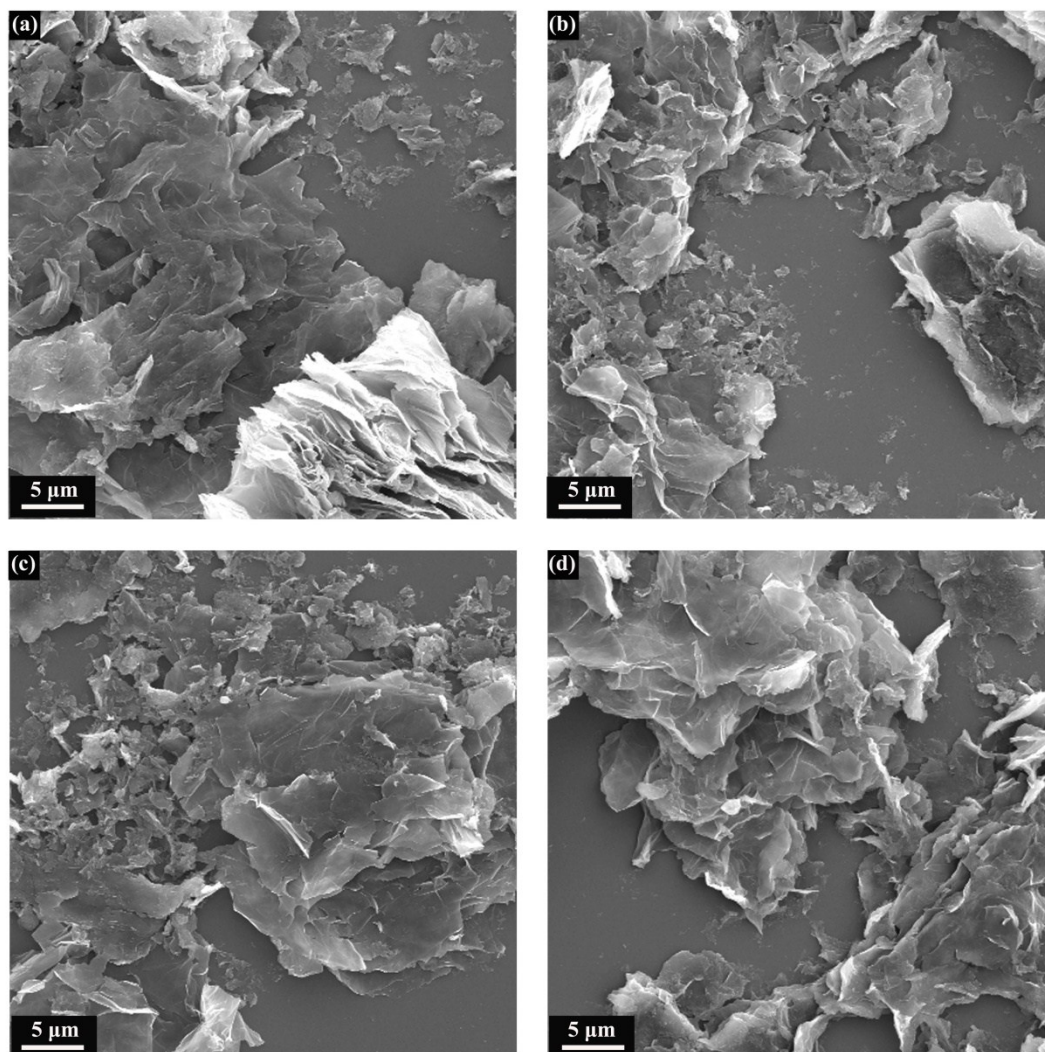

Fig. S5 SEM images of (a) P-GOF, (b) Co-GOF, (c) Fe-GOF and (d) Mn-GOF.

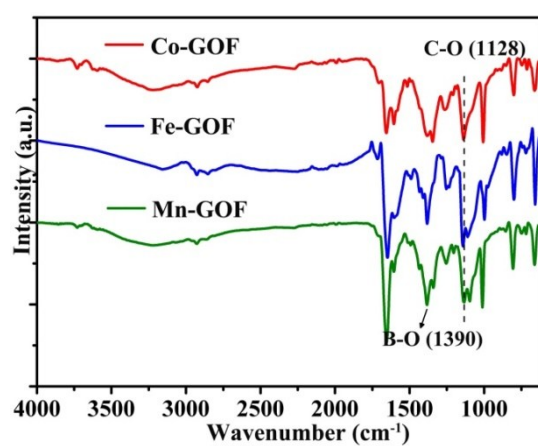

Fig. S6 IR spectra of Co- Fe- and Mn-GOFs

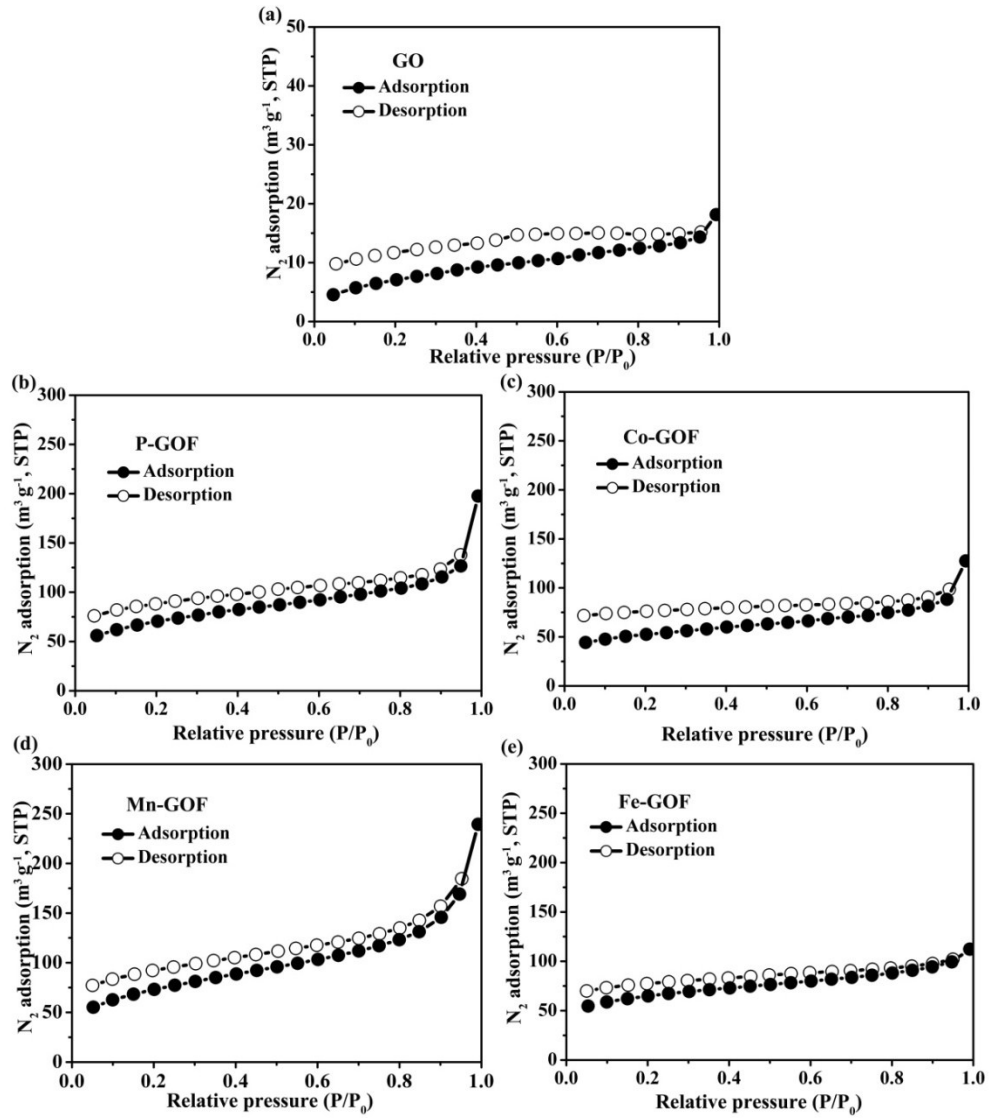

**Fig. S7**  $N_2$  adsorption and desorption of (a) GO, (b) P-GOF, (c) Co-GOF, (d) Mn-GOF, and (e) Fe-GOF.

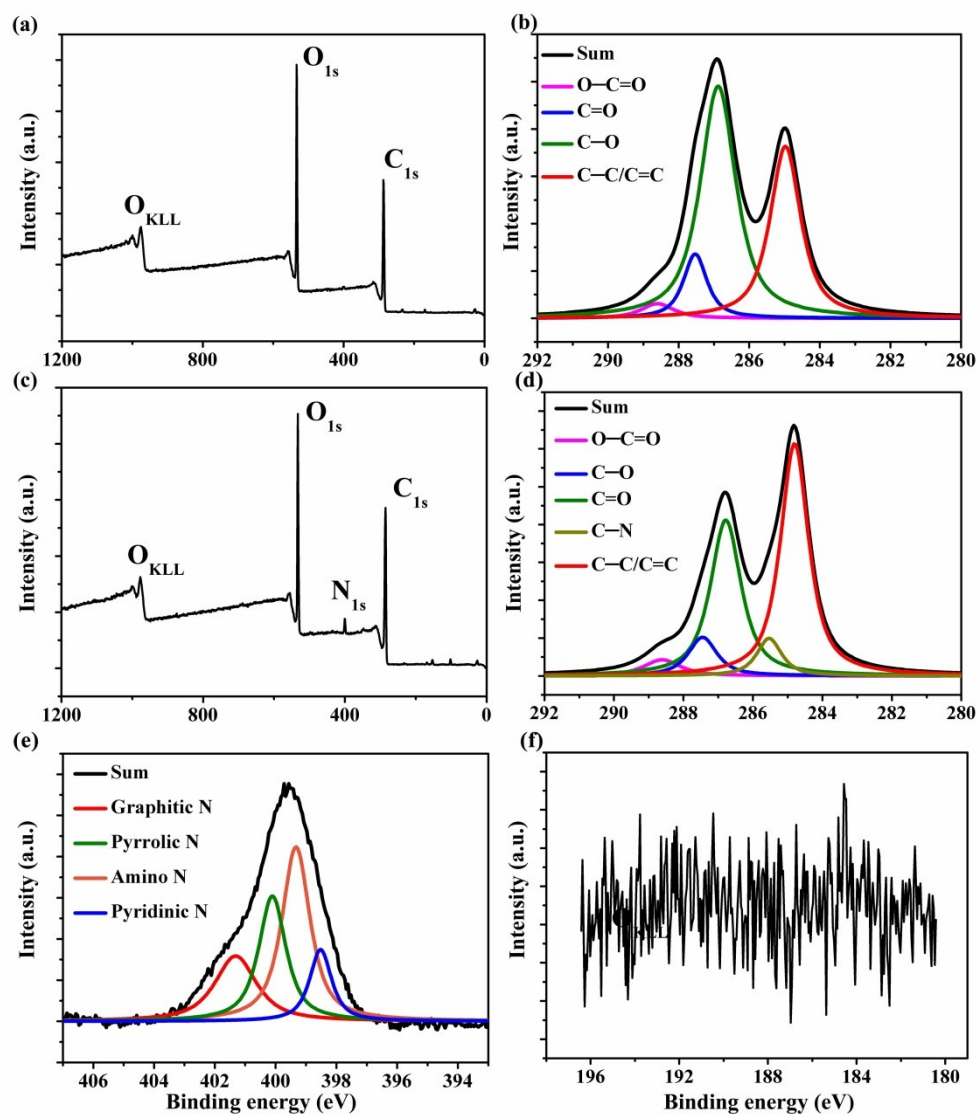

**Fig. S8** XPS survey scan spectra (a) and  $\text{C}_{1s}$  spectra (b) of GO. XPS survey scan spectra (c),  $\text{C}_{1s}$  spectra (d),  $\text{N}_{1s}$  spectra (e) and  $\text{B}_{1s}$  spectra (f) of  $\text{GO}_{\text{NH}_3}$ .

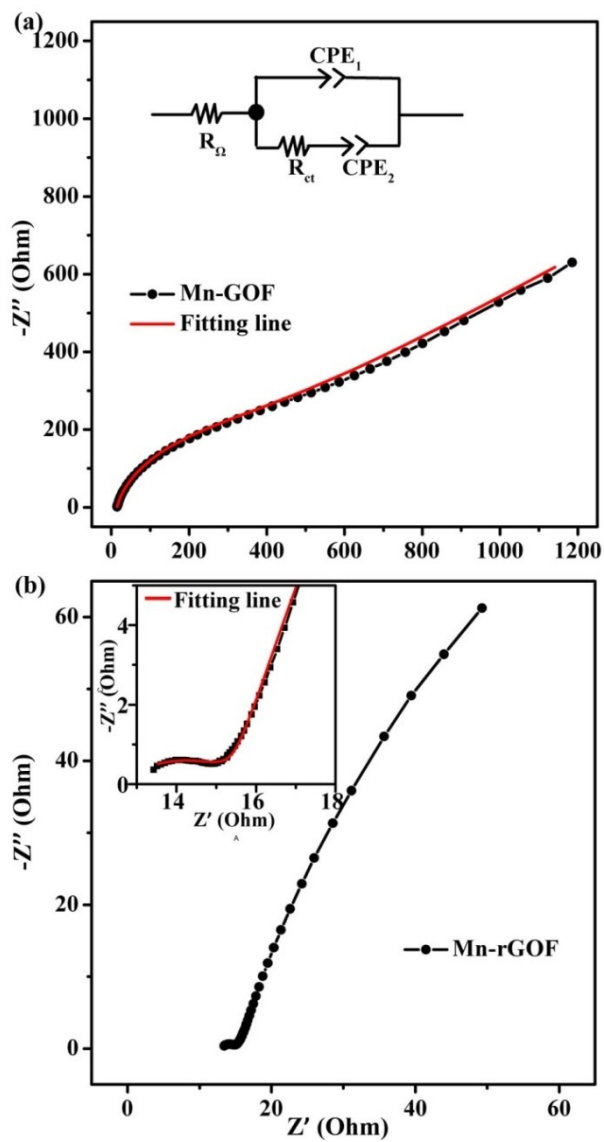

**Fig. S9** Nyquist plots of (a) Mn-GOF and (b) Mn-rGOF from  $10^5$  to 1 Hz at the open circuit potential (the red lines are fitting results).

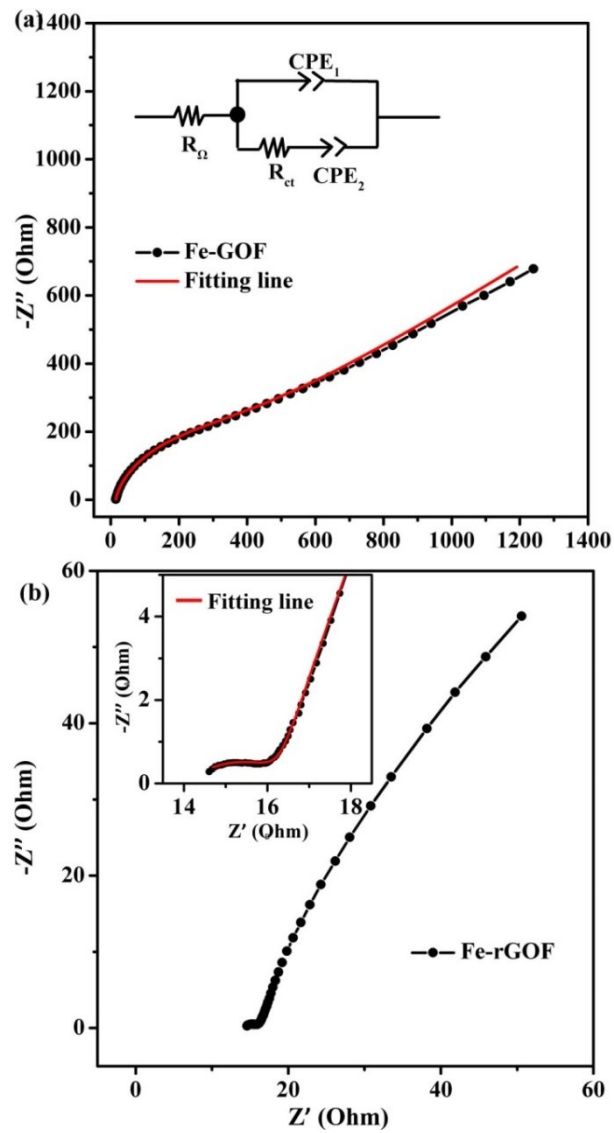

**Fig. S10** Nyquist plots of (a) Fe-GOF and (b) Fe-rGOF from  $10^5$  to 1 Hz at the open circuit potential (the red lines are fitting results).



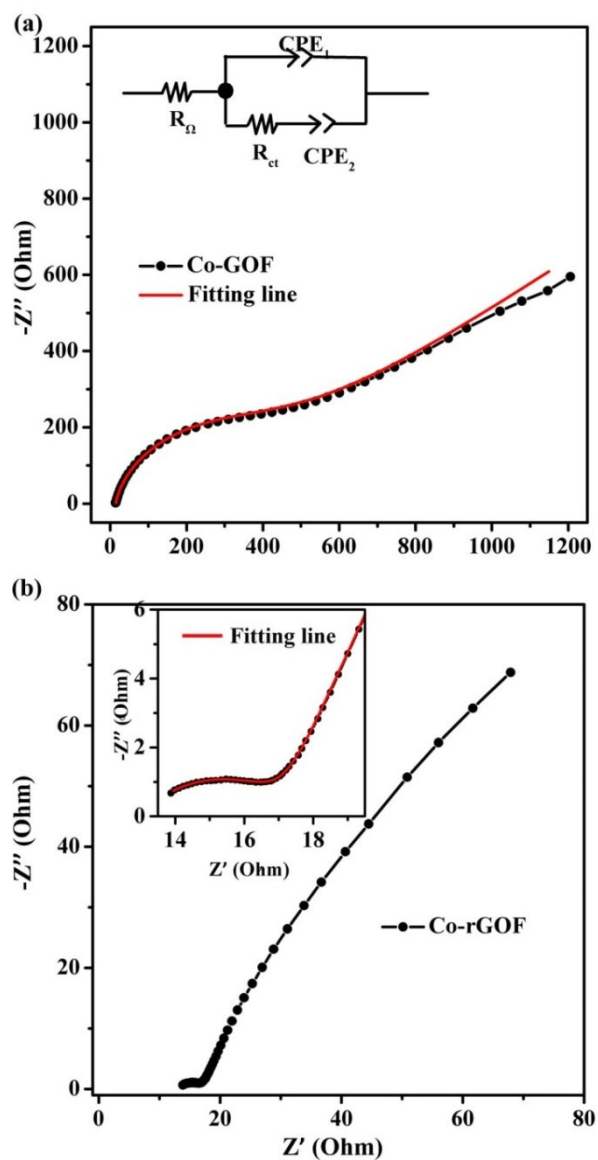

**Fig. S11** Nyquist plots of (a) Co-GOF and (b) Co-rGOF from  $10^5$  to 1 Hz at the open circuit potential (the red lines are fitting results).

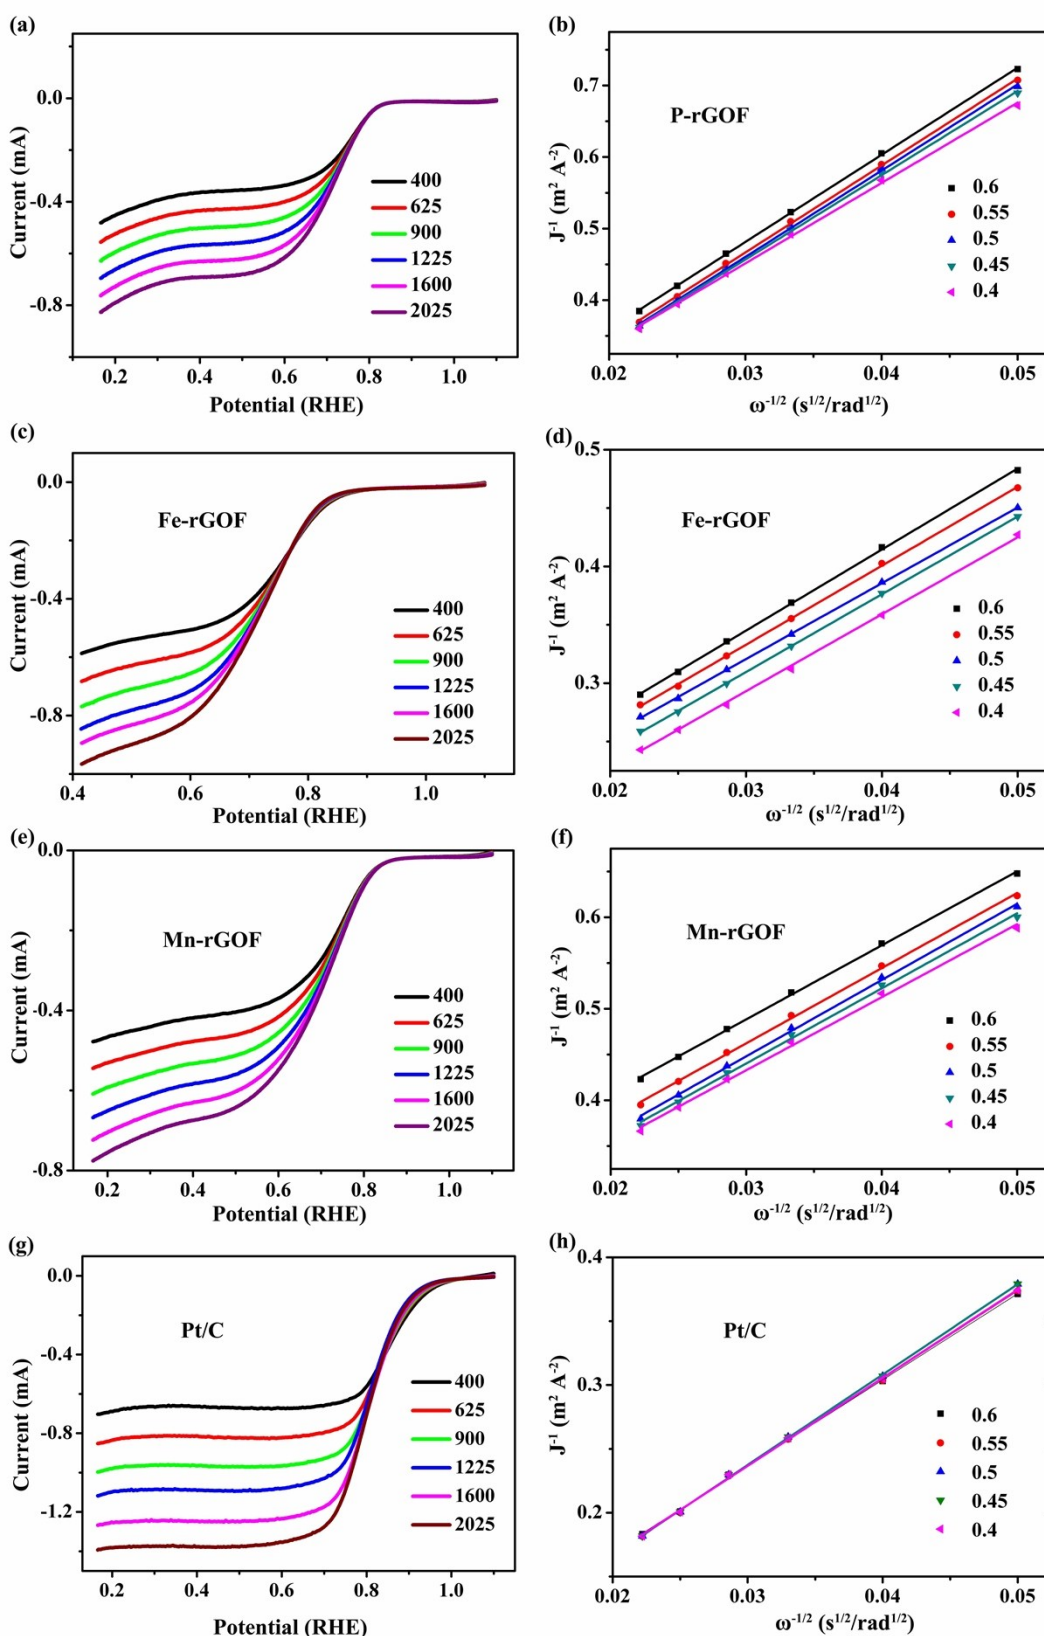

**Fig. S12** RDE measurements of ORR on (a) P-rGOF, (c) Fe-rGOF, (e) Mn-rGOF and (g) Pt/C modified glassy carbon electrode in oxygen-saturated 0.1 M KOH solution with rotating speeds varying from 400 to 2025 rpm at the a scan rate of  $10 \text{ mV s}^{-1}$  and the obtained K-L plots for (b) P-rGOF, (d) Fe-rGOF, (f) Mn-rGOF and (h) Pt/C, respectively.

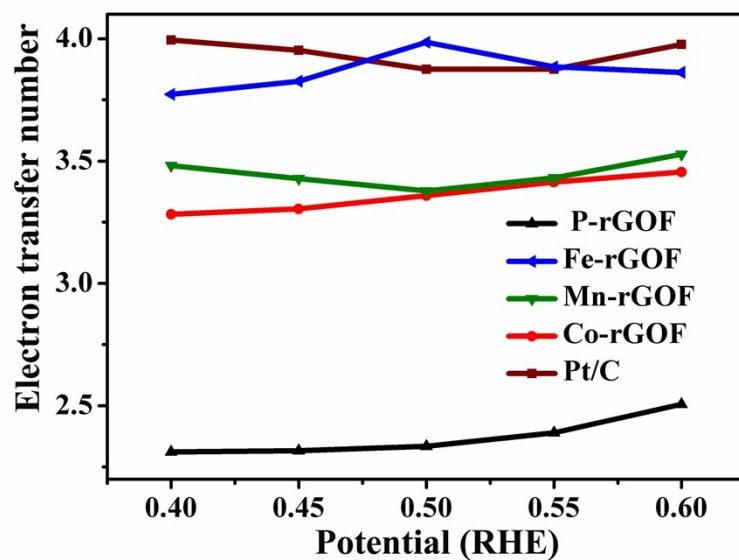

**Fig. S13** Plots of K-L equation derived electron transfer number versus potential on different modified electrodes.

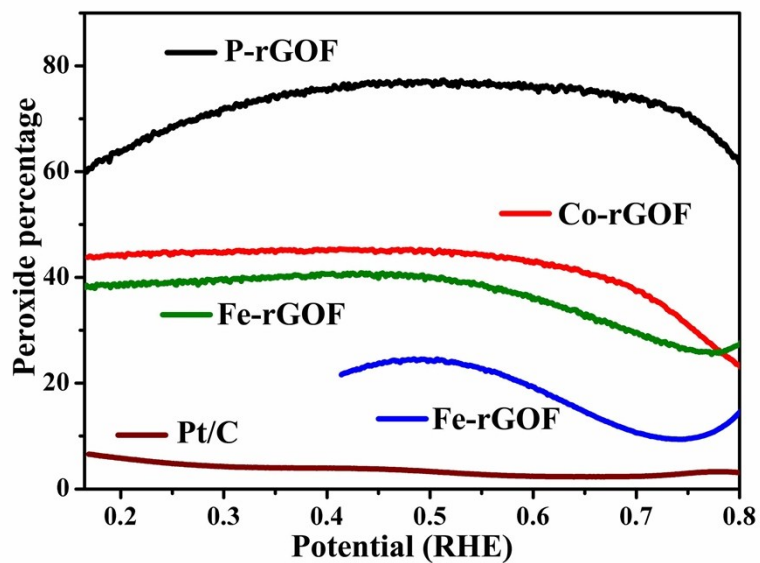

**Fig. S14** Peroxide percentages in the ORR products on P-rGOF, Co-rGOF, Fe-rGOF, Mn-rGOF and Pt/C electrodes.
